# Supplementary material for: Reductions of oxo species by aquatitanium(ii) as catalyzed by titanium(iv)
Source: Royal Society of Chemistry journal article supplement (doi:10.1039/b616438b), 2007-01-01
Supplement: b616438b.pdf [file b616438b.pdf]

Reductions of oxo species by aquatitanium(II) as catalyzed by titanium(IV)

Basab Bijayi Dhar and Edwin S. Gould

### SUPPLEMENTARY MATERIALS

Tables S-1 to S-6. Detailed kinetic data for redox reactions.

Fig. 1. Reduction of 1,4-benzoquinone by Ti(II) as catalyzed by Ti(IV); kinetic dependence on [Ti(IV)].

Fig. 2. Absorbance of Ti(II)-Ti(IV) mixtures.

Table S1 – Titanium(II) reduction of 1,4-benzoquinone as catalyzed by titanium(IV);  
kinetic data<sup>a</sup>

| $10^4[\text{Ti}^{\text{II}}]/\text{M}$ | $10^3[\text{Ti}^{\text{IV}}]/\text{M}$ | $[\text{H}^+]/\text{M}$ | $10^3k_{\text{obs}}/\text{s}^{-1}$ <sup>b</sup> |
|----------------------------------------|----------------------------------------|-------------------------|-------------------------------------------------|
| 1.00                                   | 1.00                                   | 0.50                    | 3.0 (3.1)                                       |
| 2.0                                    | 1.00                                   | 0.50                    | 6.2 (6.17)                                      |
| 4.0                                    | 1.00                                   | 0.50                    | 13.1 (12.3)                                     |
| 6.0                                    | 1.00                                   | 0.50                    | 18.2(18.5)                                      |
| 8.0                                    | 1.00                                   | 0.50                    | 24(25)                                          |
| 10.0                                   | 1.00                                   | 0.50                    | 31(31)                                          |
| 10.0                                   | 1.00                                   | 0.50                    | 37(37)                                          |
| 10.0                                   | 1.60                                   | 0.50                    | 42(42)                                          |
| 10.0                                   | 2.0                                    | 0.50                    | 48(48)                                          |
| 10.0                                   | 4.0                                    | 0.50                    | 63(64)                                          |
| 10.0                                   | 8.0                                    | 0.50                    | 78(83)                                          |
| 10.0                                   | 10.0                                   | 0.25                    | 31(31)                                          |
| 10.0                                   | 10.0                                   | 0.100                   | 29(31)                                          |

<sup>a</sup>Reactions at  $22.0 \pm 0.5$  °C,  $\mu = 0.50$  M ( $\text{HClO}_4/\text{NaClO}_4/\text{CF}_3\text{SO}_3\text{H}$ )  $\lambda = 246\text{-}260$  nm;  
 $[\text{Bzqn}] = 1.0 \times 10^{-5}$  M. <sup>b</sup>Pseudo-first order rate constants; parenthetical values were  
calculated using rate law and parameters in Table 2.

Table S2 – Titanium(II) reduction of 2,5-dichloro-3,6-dihydroxy-benzoquinone as catalyzed by titanium(IV); kinetic data<sup>a</sup>

| [Ti <sup>II</sup> ]/ mM | [Ti <sup>IV</sup> ]/ mM | [H <sup>+</sup> ]/ M | 10k <sub>obs</sub> / s <sup>-1</sup> <sup>b</sup> |
|-------------------------|-------------------------|----------------------|---------------------------------------------------|
| 1.00                    | 1.00                    | 0.50                 | 2.6(2.6)                                          |
| 1.00                    | 3.0                     | 0.50                 | 5.0(5.0)                                          |
| 1.00                    | 5.0                     | 0.50                 | 6.1(6.2)                                          |
| 1.00                    | 8.0                     | 0.50                 | 7.1(7.2)                                          |
| 1.00                    | 10.0                    | 0.50                 | 7.6(7.5)                                          |
| 2.0                     | 8.0                     | 0.50                 | 15.6(14.3)                                        |
| 4.0                     | 8.0                     | 0.50                 | 30(29)                                            |
| 6.0                     | 8.0                     | 0.50                 | 42(43)                                            |
| 8.0                     | 8.0                     | 0.50                 | 53(57)                                            |
| 2.0                     | 2.0                     | 0.50                 | 8.2(8.2)                                          |
| 2.0                     | 2.0                     | 0.25                 | 8.8(8.7)                                          |
| 2.0                     | 2.0                     | 0.100                | 10.7(10.9)                                        |

<sup>a</sup>Reactions at 22.0 ± 0.5 °C; μ = 0.50 M (HClO<sub>4</sub>/NaClO<sub>4</sub>/CF<sub>3</sub>SO<sub>3</sub>H) λ = 330 nm;

[oxidant] = 5.0 × 10<sup>-5</sup> M. <sup>b</sup>Pseudo-first order rate constants; parenthetical values were calculated using rate law and parameters in Table 2.

Table S3 – Titanium(II) reduction of 2,5-dihydroxy-1,4-benzoquinone, as catalyzed by titanium(IV); kinetic data<sup>a</sup>

| [Ti <sup>II</sup> ]/ mM | [Ti <sup>IV</sup> ]/ mM | [H <sup>+</sup> ]/ M | 10k <sub>obs</sub> / s <sup>-1</sup> <sup>b</sup> |
|-------------------------|-------------------------|----------------------|---------------------------------------------------|
| 1.00                    | 5.0                     | 0.50                 | 3.6(3.6)                                          |
| 2.0                     | 5.0                     | 0.50                 | 7.3(7.2)                                          |
| 4.0                     | 5.0                     | 0.50                 | 14.3(14.5)                                        |
| 5.0                     | 5.0                     | 0.50                 | 18.3(18.1)                                        |
| 2.0                     | 2.0                     | 0.50                 | 4.6(4.6)                                          |
| 2.0                     | 3.0                     | 0.50                 | 5.8(5.8)                                          |
| 2.0                     | 7.0                     | 0.50                 | 8.2(8.1)                                          |
| 2.0                     | 10.0                    | 0.50                 | 9.0(9.0)                                          |
| 2.0                     | 2.0                     | 0.25                 | 6.0(5.6)                                          |
| 2.0                     | 2.0                     | 0.100                | 8.3(8.4)                                          |

<sup>a</sup>Reactions at 22.0 ± 0.5 °C, μ = 0.50 M (HClO<sub>4</sub>/NaClO<sub>4</sub>/CF<sub>3</sub>SO<sub>3</sub>H), λ = 310 nm, [oxidant] = 1.0 × 10<sup>-5</sup> M. <sup>b</sup>Pseudo-first order rate constants; parenthetical values were calculated using rate law and parameters in Table 2.

Table S4 – Titanium(II) reduction of tetrahydroxy-1,4-benzoquinone, as catalyzed by titanium(IV); kinetic data<sup>a</sup>

| [Ti <sup>II</sup> ]/ mM | [Ti <sup>II</sup> ]/ mM | [H <sup>+</sup> ]/ M | 10k <sub>obs</sub> / s <sup>-1</sup> <sup>b</sup> |
|-------------------------|-------------------------|----------------------|---------------------------------------------------|
| 1.00                    | 5.0                     | 0.50                 | 4.7(4.6)                                          |
| 2.0                     | 5.0                     | 0.50                 | 8.5(9.1)                                          |
| 4.0                     | 5.0                     | 0.50                 | 18.6(18.3)                                        |
| 5.0                     | 5.0                     | 0.50                 | 22(23)                                            |
| 4.0                     | 4.0                     | 0.50                 | 17.2(16.4)                                        |
| 4.0                     | 6.0                     | 0.50                 | 20(20)                                            |
| 4.0                     | 8.0                     | 0.50                 | 22(22)                                            |
| 4.0                     | 10.0                    | 0.50                 | 24(24)                                            |
| 2.0                     | 2.0                     | 0.50                 | 4.2(4.6)                                          |
| 2.0                     | 2.0                     | 0.25                 | 4.0(4.6)                                          |
| 2.0                     | 2.0                     | 0.100                | 4.2(4.6)                                          |

<sup>a</sup>Reactions at 22.0 ± 0.5 °C, μ = 0.50 M (HClO<sub>4</sub>/NaClO<sub>4</sub>/CF<sub>3</sub>SO<sub>3</sub>H), λ = 310 nm, [oxidant] = 1.0 × 10<sup>-5</sup> M. <sup>b</sup>Pseudo-first order rate constants; parenthetical values were calculated using rate law and parameters in Table 2.

Table S5 – Titanium(II) reduction of nitrosodisulfonate as catalyzed by titanium(IV);  
kinetic data<sup>a</sup>

| $10^2[\text{Ti}^{\text{II}}]/\text{M}$ | $10^2[\text{Ti}^{\text{IV}}]/\text{M}$ | $[\text{H}^+]/\text{M}$ | $k_{\text{obs}}/\text{s}^{-1}$ <sup>b</sup> |
|----------------------------------------|----------------------------------------|-------------------------|---------------------------------------------|
| 1.00                                   | 1.00                                   | 0.50                    | 32(30)                                      |
| 1.00                                   | 1.50                                   | 0.50                    | 46(45)                                      |
| 1.00                                   | 2.0                                    | 0.50                    | 60(59)                                      |
| 1.00                                   | 2.5                                    | 0.50                    | 71(74)                                      |
| 1.50                                   | 2.5                                    | 0.50                    | 95(112)                                     |
| 1.00                                   | 1.00                                   | 0.30                    | 30(30)                                      |
| 1.00                                   | 1.00                                   | 0.100                   | 30(30)                                      |

<sup>a</sup>Reactions at  $22.0 \pm 0.5$  °C,  $\mu = 0.50$  M (LiCl/CF<sub>3</sub>SO<sub>3</sub>H/HCl),  $\lambda = 300$  nm; [NDS] =  $2.0 \times 10^{-3}$  M. <sup>b</sup>Pseudo-first order rate constants; parenthetical values were calculated using the rate law and parameters in Table 2.

Table S6 – Titanium(II) reduction of manganese(IV) as catalyzed by titanium(IV);  
 kinetic data<sup>a</sup>

| [Ti <sup>II</sup> ]/ mM | [Ti <sup>IV</sup> ]/ mM | [F <sup>-</sup> ]/ mM | [Cl <sup>-</sup> ]/ mM | [H <sup>+</sup> ]/ M | $k_{\text{obs}}/ \text{s}^{-1}$ <sup>b</sup> |
|-------------------------|-------------------------|-----------------------|------------------------|----------------------|----------------------------------------------|
| 1.00                    | 1.00                    | 0                     | 0                      | 0.50                 | 2.4(2.8)                                     |
| 2.0                     | 2.0                     | 0                     | 0                      | 0.50                 | 8.6(8.9)                                     |
| 3.5                     | 3.5                     | 0                     | 0                      | 0.50                 | 22(21)                                       |
| 5.0                     | 5.0                     | 0                     | 0                      | 0.50                 | 38(35)                                       |
| 7.0                     | 7.0                     | 0                     | 0                      | 0.50                 | 55(54)                                       |
| 10.0                    | 10.0                    | 0                     | 0                      | 0.50                 | 90(84)                                       |
| 1.00                    | 2.0                     | 0                     | 0                      | 0.50                 | 4.3(4.5)                                     |
| 1.00                    | 5.0                     | 0                     | 0                      | 0.50                 | 7.2(6.9)                                     |
| 1.00                    | 8.0                     | 0                     | 0                      | 0.50                 | 8.6(8.0)                                     |
| 1.00                    | 1.00                    | 0                     | 0                      | 0.50                 | 9.2(8.5)                                     |
| 1.00                    | 1.00                    | 1.00                  | 0                      | 0.50                 | 3.9(4.1)                                     |
| 1.00                    | 1.00                    | 2.0                   | 0                      | 0.50                 | 5.6(5.4)                                     |
| 1.00                    | 1.00                    | 5.0                   | 0                      | 0.50                 | 9.2(9.3)                                     |
| 1.00                    | 1.00                    | 7.0                   | 0                      | 0.50                 | 12.2(13.1)                                   |
| 1.00                    | 1.00                    | 10.0                  | 0                      | 0.50                 | 17.2(16.0)                                   |
| 1.00                    | 1.00                    | 0                     | 1.00                   | 0.50                 | 2.9(3.0)                                     |
| 1.00                    | 1.00                    | 0                     | 5.0                    | 0.50                 | 4.0(4.0)                                     |
| 1.00                    | 1.00                    | 0                     | 10.0                   | 0.50                 | 5.5(5.5)                                     |
| 1.00                    | 1.00                    | 0                     | 0                      | 0.10                 | 2.5(2.8)                                     |

<sup>a</sup>Reductions of the biguanide complex,  $[\text{Mn}^{\text{IV}}(\text{bigH})_3]^{4+}$ . Reactions were run at  $22.0 \pm 0.5$  °C,  $\mu = 0.50$  M, (HClO<sub>4</sub>/NaClO<sub>4</sub>/CF<sub>3</sub>SO<sub>3</sub>H),  $\lambda = 430$  nm.  $[\text{Mn}^{\text{IV}}] = 1.0 \times 10^{-4}$  M. <sup>b</sup>Pseudo-first order rate constants; parenthetical values were calculated using rate laws and parameters in Table 2.

**Figure captions:**

**Fig. 1** Plot of  $k_{\text{obs}}$  vs.  $[\text{Ti(IV)}]$  for the reduction of 1,4-benzoquinone by Ti(II). In all the sets,  $[\text{Ti(II)}] = 1.0 \text{ mM}$ ,  $[\text{oxidant}] = 0.010 \text{ mM}$ ,  $[\text{H}^+] = 0.50 \text{ M}$ ,  $\mu = 0.5 \text{ M}$  ( $\text{HClO}_4/\text{CF}_3\text{SO}_3\text{H}$ ) and  $T = 22.0 \pm 0.5 \text{ }^\circ\text{C}$ . Solid line was calculated using rate law and kinetic parameters in Table 2.

**Fig. 2** Absorbance at 428 nm vs.  $[\text{Ti(IV)}]$  for the Ti(II) solutions. In all the sets,  $[\text{Ti(II)}] = 1.0 \text{ mM}$ ,  $[\text{H}^+] = 0.50 \text{ M}$ ,  $\mu = 0.5 \text{ M}$  ( $\text{HClO}_4/\text{CF}_3\text{SO}_3\text{H}$ ),  $T = 22.0 \pm 0.5 \text{ }^\circ\text{C}$ . Optical path length = 1.0 cm. Solid line represents calculated values using the equation:

$$\frac{\text{Abs}}{[\text{Ti}^{\text{II}}]} = \frac{\epsilon_{\text{Ti}^{\text{II}}} + K\epsilon_{\text{Ti}^{\text{II,IV}}}[\text{Ti}^{\text{IV}}]}{1 + K[\text{Ti}^{\text{IV}}]}$$

taking  $\epsilon_{\text{Ti}^{\text{II}}} = 0.33 \text{ M}^{-1}\text{cm}^{-1}$ ,  $\epsilon_{\text{Ti}^{\text{II,IV}}} = 19.3 \text{ M}^{-1}\text{cm}^{-1}$  and  $K = 293 \text{ M}^{-1}$ .



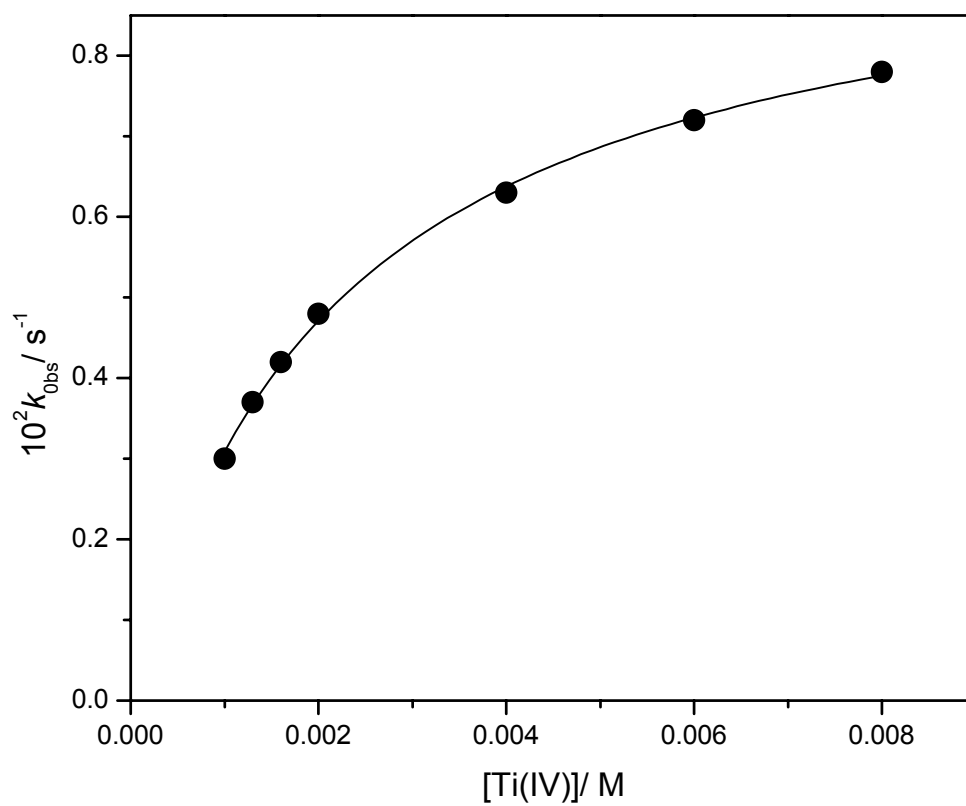

**Fig. 1**

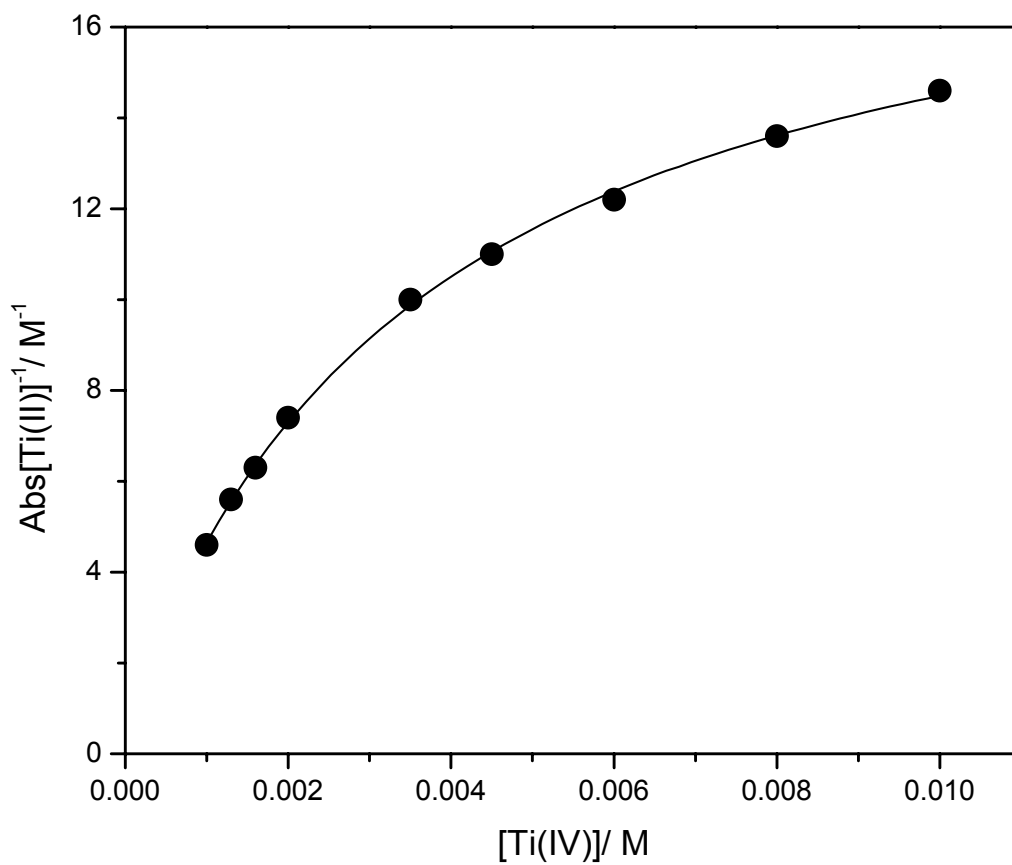

**Fig. 2**
